# Supplementary material for: Application of Multivariate Regression and Artificial Neural Network Modelling for Prediction of Physicochemical Properties of Grape-Skin Compost
Source: MDPI journal article supplement (doi:10.3390/bioengineering11030285), 2024-03-16
Supplement: s1 [file s1]

# Application of Multivariate Regression and Artificial Neural Network Modelling for Prediction of Physicochemical Properties of Grape-Skin Compost

Tea Sokač Cvetnić <sup>1</sup>, Korina Krog <sup>1</sup>, Davor Valinger <sup>1</sup>, Jasenka Gajdoš Kljusurić <sup>1,\*</sup>, Maja Benković <sup>1</sup>, Tamara Jurina <sup>1</sup>, Tamara Jakovljević <sup>2</sup>, Ivana Radojčić Redovniković <sup>1</sup> and Ana Jurinjak Tušek <sup>1</sup>

**Citation:** Sokač Cvetnić, T.; Krog, K.; Valinger, D.; Gajdoš Kljusurić, J.; Benković, M.; Jurina, T.; Jakovljević, T.; Radojčić Redovniković, I.; Jurinjak Tušek, A. Application of Multivariate Regression and Artificial Neural Network Modelling for Prediction of Physicochemical Properties of Grape-Skin Compost. *Bioengineering* **2024**, *11*, 285. <https://doi.org/10.3390/bioengineering11030285>

Academic Editor: Martin Koller

Received: 21 February 2024

Revised: 7 March 2024

Accepted: 13 March 2024

Published: 16 March 2024

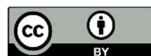

**Copyright:** © 2024 by the authors. Licensee MDPI, Basel, Switzerland. This article is an open access article distributed under the terms and conditions of the Creative Commons Attribution (CC BY) license (<https://creativecommons.org/licenses/by/4.0/>).

<sup>1</sup> Faculty of Food Technology and Biotechnology, University of Zagreb, Pierottijeva 6, 10 000 Zagreb, Croatia; tsokac@pbf.hr (T.S.C.); kkrog@pbf.hr (K.K.); davor.valinger@pbf.unizg.hr (D.V.); maja.benkovic@pbf.unizg.hr (M.B.); tamara.jurina@pbf.unizg.hr (T.J.); irredovnikovic@pbf.hr (I.R.R.); ana.tusek.jurinjak@pbf.unizg.hr (A.J.T.)

<sup>2</sup> Croatian Forest Research Institute, Cvjetno naselje 41, 10 450 Jastrebarsko, Croatia; tamaraj@sumins.hr

\* Correspondence: jasenka.gajdos@pbf.unizg.hr

## Supplementary Materials

**Table S1.** Coefficients and statistics of multiple linear regression models for prediction of physicochemical properties of compost during the composting process based on initial moisture content, air flow rate, sampling day. Significant coefficients and standard errors (SE) are marked bold.

| Output variable  | Coeff. | Coefficient ± SE | Calibration |                   |       |         |         | Prediction   |                    |       |       |       |       |
|------------------|--------|------------------|-------------|-------------------|-------|---------|---------|--------------|--------------------|-------|-------|-------|-------|
|                  |        |                  | $R_{cal}^2$ | $R_{cal}^2_{adj}$ | RMSE  | F-value | p-value | $R_{pred}^2$ | $R_{pred}^2_{adj}$ | RMSEP | SEP   | RPD   | RER   |
| Moisture content | $b_0$  | -5.787±2.514     |             |                   |       |         |         |              |                    |       |       |       |       |
|                  | $b_1$  | 1.086±0.041      | 0.779       | 0.777             | 2.772 | 268.180 | p<0.001 | 0.738        | 0.738              | 2.781 | 0.245 | 1.948 | 7.274 |
|                  | $b_2$  | 1.577±0.304      |             |                   |       |         |         |              |                    |       |       |       |       |
|                  | $b_3$  | 0.182±0.018      |             |                   |       |         |         |              |                    |       |       |       |       |
| Dry matter       | $b_0$  | 105.787±2.514    |             |                   |       |         |         |              |                    |       |       |       |       |
|                  | $b_1$  | -1.086±0.041     | 0.779       | 0.777             | 2.772 | 268.183 | p<0.001 | 0.738        | 0.738              | 2.781 | 0.245 | 1.948 | 7.274 |
|                  | $b_2$  | -1.577±0.304     |             |                   |       |         |         |              |                    |       |       |       |       |
|                  | $b_3$  | -0.182±0.018     |             |                   |       |         |         |              |                    |       |       |       |       |
| Organic matter   | $b_0$  | 103.767±4.004    |             |                   |       |         |         |              |                    |       |       |       |       |
|                  | $b_1$  | -0.452±0.066     | 0.489       | 0.484             | 4.473 | 63.451  | p<0.001 | 0.422        | 0.408              | 4.735 | 0.417 | 1.314 | 5.883 |
|                  | $b_2$  | -2.251±0.484     |             |                   |       |         |         |              |                    |       |       |       |       |
|                  | $b_3$  | -0.327±0.028     |             |                   |       |         |         |              |                    |       |       |       |       |
| Ash content      | $b_0$  | -3.767±1.004     |             |                   |       |         |         |              |                    |       |       |       |       |
|                  | $b_1$  | 0.452±0.065      | 0.489       | 0.484             | 4.473 | 63.451  | p<0.001 | 0.428        | 0.415              | 4.648 | 0.409 | 1.321 | 5.991 |
|                  | $b_2$  | 2.251±0.485      |             |                   |       |         |         |              |                    |       |       |       |       |
|                  | $b_3$  | 0.327±0.029      |             |                   |       |         |         |              |                    |       |       |       |       |
| Carbon content   | $b_0$  | 53.562±1.175     |             |                   |       |         |         |              |                    |       |       |       |       |
|                  | $b_1$  | -0.065±0.019     | 0.361       | 0.352             | 1.242 | 19.053  | p<0.001 | 0.321        | 0.305              | 1.359 | 0.119 | 1.177 | 6.034 |
|                  | $b_2$  | -0.729±0.142     |             |                   |       |         |         |              |                    |       |       |       |       |
|                  | $b_3$  | -0.041±0.008     |             |                   |       |         |         |              |                    |       |       |       |       |
| Nitrogen content | $b_0$  | 1.409±0.352      |             |                   |       |         |         |              |                    |       |       |       |       |
|                  | $b_1$  | 0.001±0.005      | 0.158       | 0.149             | 0.424 | 18.667  | p<0.001 | 0.123        | 0.102              | 0.583 | 0.051 | 0.806 | 3.789 |
|                  | $b_2$  | 0.150±0.042      |             |                   |       |         |         |              |                    |       |       |       |       |
|                  | $b_3$  | 0.016±0.003      |             |                   |       |         |         |              |                    |       |       |       |       |
| C/N ratio        | $b_0$  | 34.162±5.302     |             |                   |       |         |         |              |                    |       |       |       |       |
|                  | $b_1$  | -0.016±0.087     | 0.171       | 0.162             | 6.056 | 20.492  | p<0.001 | 0.128        | 0.107              | 6.738 | 0.593 | 1.065 | 4.575 |
|                  | $b_2$  | -1.952±0.642     |             |                   |       |         |         |              |                    |       |       |       |       |
|                  | $b_3$  | -0.272±0.038     |             |                   |       |         |         |              |                    |       |       |       |       |
| ΔE (compost)     | $b_0$  | 12.170±3.022     |             |                   |       |         |         |              |                    |       |       |       |       |
|                  | $b_1$  | -0.059±0.049     | 0.289       | 0.281             | 3.331 | 37.693  | p<0.001 | 0.271        | 0.253              | 3.444 | 0.303 | 1.207 | 4.919 |
|                  | $b_2$  | -2.182±0.364     |             |                   |       |         |         |              |                    |       |       |       |       |

|                               |       |                  |       |       |        |        |        |       |       |         |        |       |       |
|-------------------------------|-------|------------------|-------|-------|--------|--------|--------|-------|-------|---------|--------|-------|-------|
|                               | $b_3$ | 0.208±0.023      |       |       |        |        |        |       |       |         |        |       |       |
| pH                            | $b_0$ | 2.713±0.773      |       |       |        |        |        |       |       |         |        |       |       |
|                               | $b_1$ | 0.054±0.013      | 0.447 | 0.441 | 0.883  | 80.228 | <0.001 | 0.391 | 0.376 | 0.915   | 0.081  | 1.278 | 5.167 |
|                               | $b_2$ | 0.289±0.093      |       |       |        |        |        |       |       |         |        |       |       |
|                               | $b_3$ | 0.081±0.006      |       |       |        |        |        |       |       |         |        |       |       |
| TDS                           | $b_0$ | 523.463±278.832  |       |       |        |        |        |       |       |         |        |       |       |
|                               | $b_1$ | 1.231±0.0457     | 0.422 | 0.416 | 318.47 | 72.403 | <0.001 | 0.396 | 0.382 | 342.322 | 30.139 | 1.275 | 5.308 |
|                               | $b_2$ | 223.603±33.762   |       |       |        |        |        |       |       |         |        |       |       |
|                               | $b_3$ | 25.896±2.007     |       |       |        |        |        |       |       |         |        |       |       |
| S                             | $b_0$ | 1460.037±566.110 |       |       |        |        |        |       |       |         |        |       |       |
|                               | $b_1$ | -3.969±0.929     | 0.412 | 0.406 | 646.60 | 69.490 | <0.001 | 0.345 | 0.329 | 721.174 | 63.456 | 1.216 | 6.182 |
|                               | $b_2$ | 372.793±68.547   |       |       |        |        |        |       |       |         |        |       |       |
|                               | $b_3$ | 53.389±4.074     |       |       |        |        |        |       |       |         |        |       |       |
| $\Delta E$ (compost extracts) | $b_0$ | -0.042±0.009     |       |       |        |        |        |       |       |         |        |       |       |
|                               | $b_1$ | 0.009±0.001      | 0.196 | 0.187 | 1.013  | 19.743 | <0.001 | 0.185 | 0.165 | 1.199   | 0.106  | 1.132 | 4.269 |
|                               | $b_2$ | 0.399±0.112      |       |       |        |        |        |       |       |         |        |       |       |
|                               | $b_3$ | 0.048±0.007      |       |       |        |        |        |       |       |         |        |       |       |

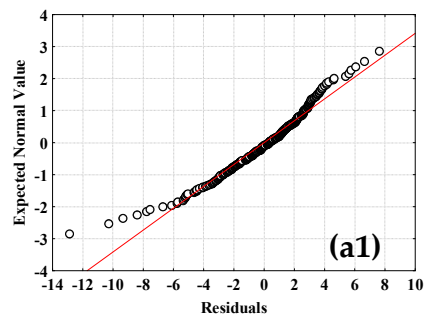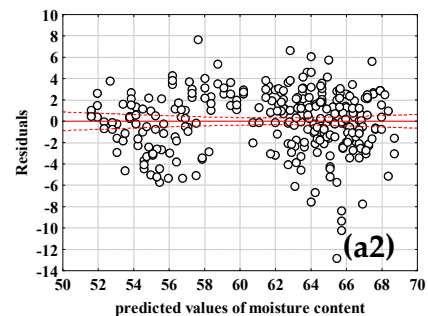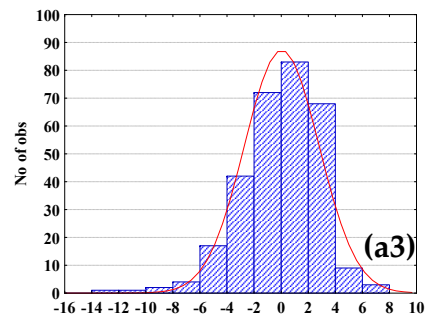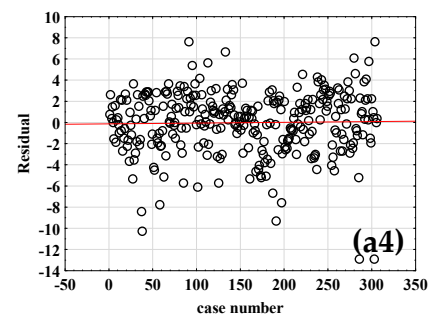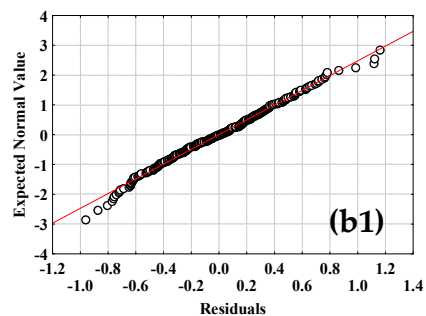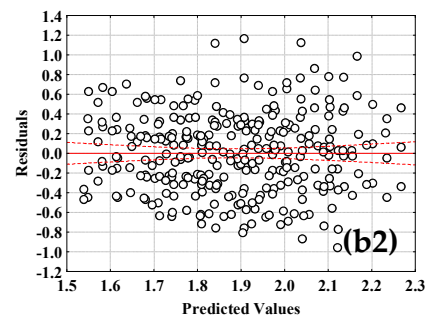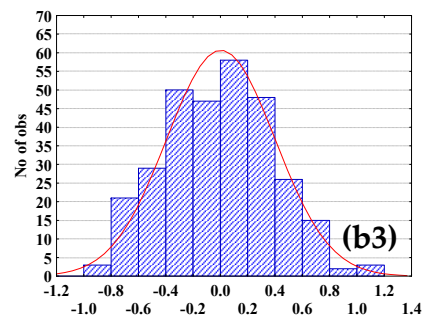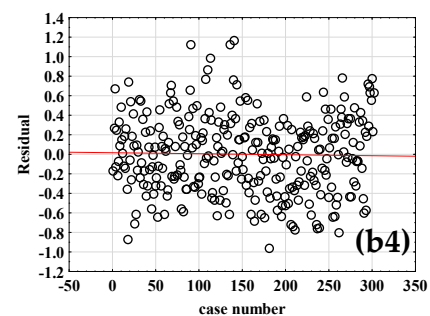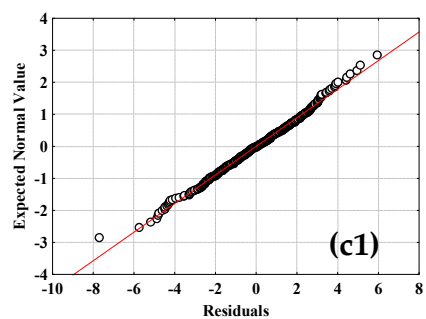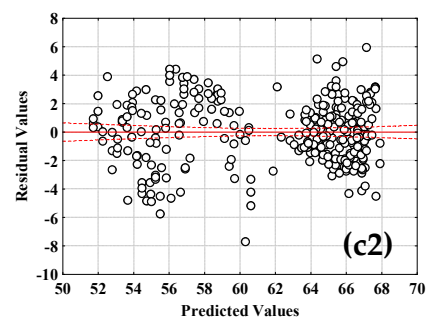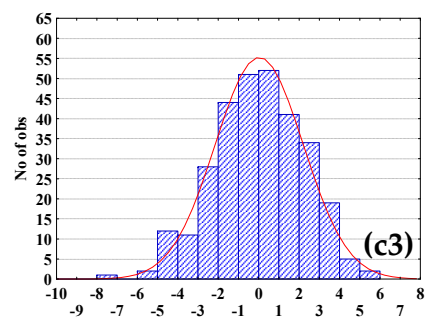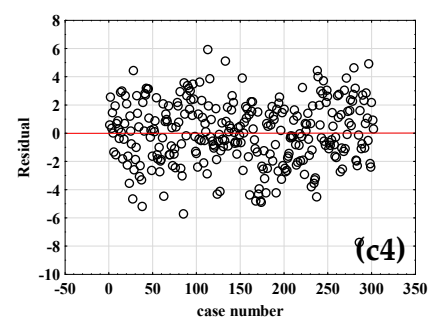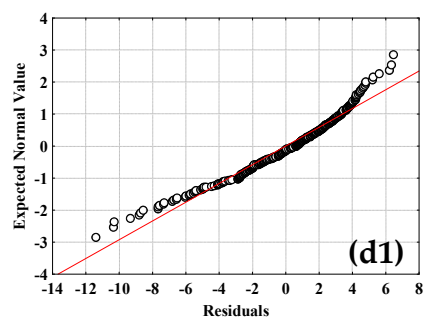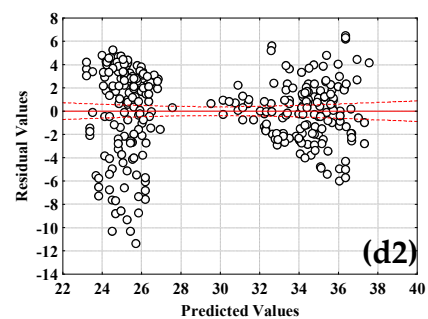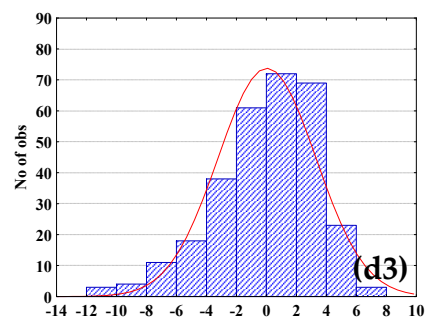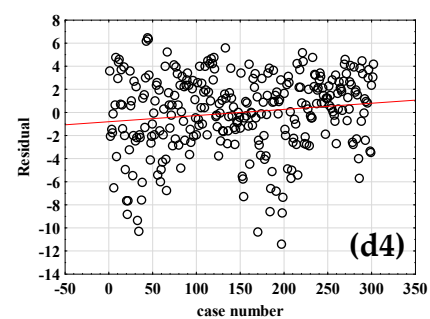

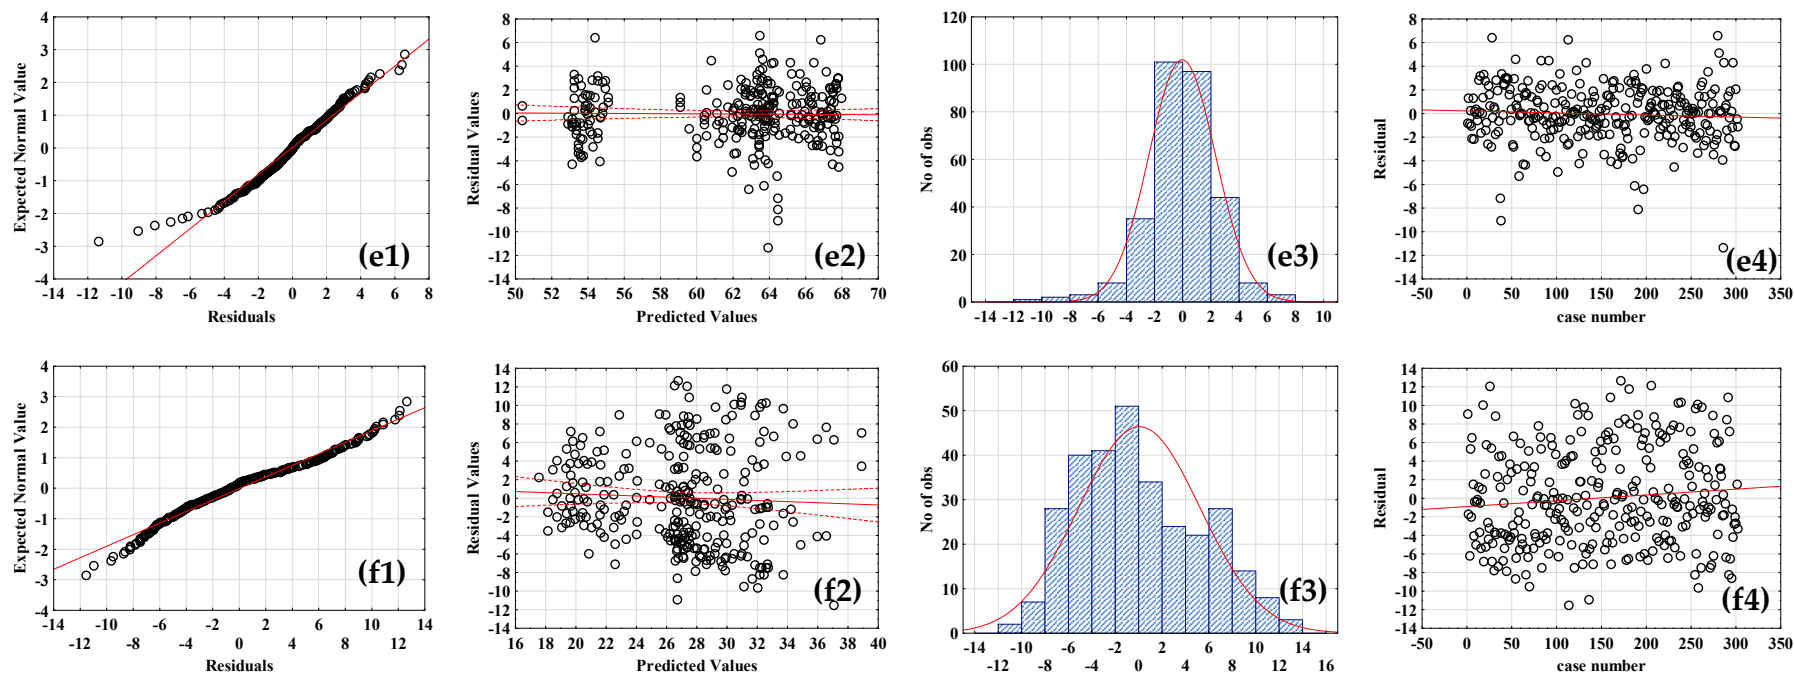

**Figure S1.** Analysis of the residuals for the: (a) MLR model describing moisture content, (b) MLR model describing total dissolved solids values, (c) PLR model describing moisture content, (d) PLR model describing ash content, (e) ANN model describing moisture content and (f) ANN model describing C/N ratio. (1) normal probability plot, (2) predicted value plots vs. residual plot, (3) histogram of residuals, (4) case vs residual plot.

**Table S2.** Coefficients and statistics of piecewise linear regression models for prediction of physicochemical properties of compost during the composting process based on initial moisture content, air flow and sampling day. Significant coefficients and standard errors (SE) are marked bold.

| Output variable  | Coefficient ± SE |                               | Calibration                   |                                              |       |         | Prediction                     |                                               |       |       |       |       |
|------------------|------------------|-------------------------------|-------------------------------|----------------------------------------------|-------|---------|--------------------------------|-----------------------------------------------|-------|-------|-------|-------|
|                  |                  |                               | R <sub>cal</sub> <sup>2</sup> | R <sub>cal</sub> <sup>2</sup> <sub>adj</sub> | RMSE  | F-value | R <sub>pred</sub> <sup>2</sup> | R <sub>pred</sub> <sup>2</sup> <sub>adj</sub> | RMSEP | SEP   | RPD   | RER   |
| Moisture content | Break point      | 61.801±7.126                  | 0.837                         | 0.835                                        | 2.501 | 508.638 | 0.834                          | 0.831                                         | 2.144 | 0.189 | 2.526 | 9.433 |
|                  | b <sub>0</sub>   | 19.059±4.159<br>32.022±6.161  |                               |                                              |       |         |                                |                                               |       |       |       |       |
|                  | b <sub>1</sub>   | 0.609±0.073<br>0.511±0.078    |                               |                                              |       |         |                                |                                               |       |       |       |       |
|                  | b <sub>2</sub>   | 1.867±0.139<br>0.571±0.148    |                               |                                              |       |         |                                |                                               |       |       |       |       |
|                  | b <sub>3</sub>   | 0.136±0.005<br>0.119±0.008    |                               |                                              |       |         |                                |                                               |       |       |       |       |
|                  |                  |                               |                               |                                              |       |         |                                |                                               |       |       |       |       |
|                  |                  |                               |                               |                                              |       |         |                                |                                               |       |       |       |       |
|                  |                  |                               |                               |                                              |       |         |                                |                                               |       |       |       |       |
| Dry matter       | Break point      | 38.198±6.851                  | 0.837                         | 0.835                                        | 2.501 | 508.638 | 0.835                          | 0.831                                         | 2.131 | 0.189 | 2.543 | 9.493 |
|                  | b <sub>0</sub>   | 67.979±8.375<br>80.940±7.492  |                               |                                              |       |         |                                |                                               |       |       |       |       |
|                  | b <sub>1</sub>   | -0.511±0.021<br>-0.609±0.177  |                               |                                              |       |         |                                |                                               |       |       |       |       |
|                  | b <sub>2</sub>   | -0.576±0.126<br>-1.867±0.241  |                               |                                              |       |         |                                |                                               |       |       |       |       |
|                  | b <sub>3</sub>   | -0.121±0.002<br>-0.136±0.021  |                               |                                              |       |         |                                |                                               |       |       |       |       |
|                  |                  |                               |                               |                                              |       |         |                                |                                               |       |       |       |       |
|                  |                  |                               |                               |                                              |       |         |                                |                                               |       |       |       |       |
|                  |                  |                               |                               |                                              |       |         |                                |                                               |       |       |       |       |
| Organic matter   | Break point      | 70.203±9.513                  | 0.675                         | 0.672                                        | 3.322 | 205.003 | 0.652                          | 0.650                                         | 3.503 | 0.308 | 1.776 | 7.951 |
|                  | b <sub>0</sub>   | 85.588±11.537<br>83.851±4.382 |                               |                                              |       |         |                                |                                               |       |       |       |       |
|                  | b <sub>1</sub>   | -0.319±0.015<br>-0.125±0.067  |                               |                                              |       |         |                                |                                               |       |       |       |       |
|                  | b <sub>2</sub>   | -1.823±0.937<br>-1.124±0.099  |                               |                                              |       |         |                                |                                               |       |       |       |       |
|                  | b <sub>3</sub>   | -0.157±0.014<br>-0.077±0.025  |                               |                                              |       |         |                                |                                               |       |       |       |       |
|                  |                  |                               |                               |                                              |       |         |                                |                                               |       |       |       |       |
|                  |                  |                               |                               |                                              |       |         |                                |                                               |       |       |       |       |
|                  |                  |                               |                               |                                              |       |         |                                |                                               |       |       |       |       |

Table S2. Continuing

[illegible]

Table S2. Continuing

[illegible]



Table S2. Continuing

[illegible]
